# Supplementary material for: One hour post-load plasma glucose and 3 year risk of worsening fasting and 2 hour glucose tolerance in the RISC cohort
Source: Springer Nature journal article supplement (doi:10.1007/s00125-018-4798-5), 2018-12-29

# Electronic Supplementary Material (ESM)

**One hour post-load plasma glucose and three-year risk of worsening fasting and 2 hour glucose tolerance in the RISC cohort**

Melania Manco<sup>1</sup>, Andrea Mari<sup>2</sup>, John Petrie<sup>3</sup>, Geltrude Mingrone<sup>4,5</sup>, Beverley Balkau<sup>6</sup>, for the EGIR-RISC study group

<sup>1</sup> Research Area for Multifactorial Diseases and Complex Phenotypes, Bambino Gesù Children's Hospital, Rome. Italy.

<sup>2</sup> CNR Institute of Neuroscience, Padua, Italy.

<sup>3</sup> Institute of Cardiovascular and Medical Sciences, University of Glasgow. United Kingdom.

<sup>4</sup> Department of Internal Medicine, IRCCS Policlinico Universitario A. Gemelli, Catholic University of Sacred Heart, Largo Agostino Gemelli 8, 00168, Rome, Italy and

<sup>5</sup> Department of Diabetes, King's College London, United Kingdom.

<sup>6</sup> CESP Centre for Research in Epidemiology and Population Health, Univ Paris-Saclay, Univ Paris Sud, UVSQ, UMRS 1018, Villejuif, France.

**ESM Table 1** Anthropometrics and metabolic characteristics of RISC participants who had baseline 1hPG <8.6 mmol/l and progressed over 3 years to isolated IFG, isolated IGT, both.

Low 1hPG < 8.6 mmol/l

|                                                                        | Non<br>progressor<br><br>n=505<br>(81%) | Progressor                            |                                                                          | <i>P-values</i> |                                  | Progressor<br>isolated<br>2hPH<br>n=26<br>(4%) | Progressor<br>both FPG &<br>2hPG high<br>n=8<br>(1%) | <i>P-values</i> |           |
|------------------------------------------------------------------------|-----------------------------------------|---------------------------------------|--------------------------------------------------------------------------|-----------------|----------------------------------|------------------------------------------------|------------------------------------------------------|-----------------|-----------|
|                                                                        |                                         | Isolated<br>high FPG<br>n=81<br>(13%) | <i>comparing isolated high FPG and<br/>isolated high 2hPG progressor</i> |                 | <i>comparing four<br/>groups</i> |                                                |                                                      |                 |           |
|                                                                        |                                         |                                       | univariate                                                               | adjusted†       |                                  |                                                |                                                      | univariate      | adjusted† |
| <b>At baseline</b>                                                     |                                         |                                       |                                                                          |                 |                                  |                                                |                                                      |                 |           |
| Men                                                                    | 37%                                     | 49%                                   |                                                                          |                 | 35%                              | 38%                                            | 0.2138                                               | 2496            |           |
| Age (years)                                                            | 42<br>(36;49 )                          | 46<br>(38;53)                         | 0.1844                                                                   | 0.9976          | 46<br>(41;55)                    | 44<br>(39;54)                                  | 0.0003                                               | 0.0006          |           |
| BMI (kg/m <sup>2</sup> )                                               | 23.8<br>(21.8;26.2)                     | 25.2<br>(23.4;27.6)                   | 0.2541                                                                   | 0.2840          | 24.7<br>(23.2;27.7)              | 28.2<br>(24.6;29.8)                            | 0.0006                                               | 0.0034          |           |
| Diabetes in family                                                     | 21%                                     | 22%                                   |                                                                          |                 | 19%                              | 50%                                            | 0.3204                                               | 0.3456          |           |
| Smoker                                                                 | 25%                                     | 28%                                   |                                                                          |                 | 19%                              | 12%                                            | 0.6677                                               | 0.5135          |           |
| Fasting plasma glucose (mmol/l)                                        | 4.9<br>(4.6;5.1)                        | 5.3<br>(5.0;5.4)                      | 0.0061                                                                   | 0.0101          | 5.0<br>(4.7;5.2)                 | 5.0<br>(4.9;5.3)                               | <.0001                                               | <.0001          |           |
| 2 hour plasma glucose (mmol/l)                                         | 5.0<br>(4.3;5.8)                        | 5.3<br>(4.6;6.0)                      | 0.0050                                                                   | 0.0068          | 6.0<br>(5.7;6.8)                 | 6.5<br>(6.0;6.9)                               | <.0001                                               | <.0001          |           |
| LDL-cholesterol (mmol/l)                                               | 2.8<br>(2.2;3.3)                        | 2.8<br>(2.2;3.3)                      |                                                                          |                 | 3.1<br>(2.8;3.7)                 | 3.0<br>(2.6;3.0)                               | 0.0630                                               | 0.1429          |           |
| HDL-cholesterol (mmol/l)                                               | 1.5<br>(1.2;1.7)                        | 1.3<br>(1.1;1.7)                      |                                                                          |                 | 1.3<br>(1.1;1.6)                 | 1.3 (<br>1.1;1.6)                              | 0.0796                                               | 0.0871          |           |
| Triglycerides (mmol/l) <sup>a</sup>                                    | 0.83<br>(0.62;1.14)                     | 0.93<br>(0.68;1.14)                   |                                                                          |                 | 1.00<br>(0.65;1.32)              | 0.81<br>(0.63;1.41)                            | 0.3323                                               | 0.6122          |           |
| Systolic blood pressure (mmHg)                                         | 115<br>(107;124)                        | 120<br>(111;128)                      |                                                                          |                 | 116<br>(109;126)                 | 120<br>(112;128)                               | 0.0879                                               | 0.9839          |           |
| Diastolic blood pressure<br>(mmHg)                                     | 73<br>(67;79)                           | 75<br>(70;79)                         |                                                                          |                 | 74<br>(70;77)                    | 77<br>(70;84)                                  | 0.2285                                               | 0.8246          |           |
| Basal insulin secretion<br>(pmol·min <sup>-1</sup> ·m <sup>-2</sup> )* | 61<br>(49;78)                           | 68<br>(53;92)                         |                                                                          |                 | 71<br>(58;92)                    | 70<br>(68;96)                                  | 0.0134                                               | 0.1289          |           |
| Total insulin secretion                                                | 36                                      | 37                                    | 0.0069                                                                   | 0.0057          | 45                               | 40                                             | 0.0015                                               | 0.0075          |           |

|                                                                |             |             |        |        |            |            |        |        |
|----------------------------------------------------------------|-------------|-------------|--------|--------|------------|------------|--------|--------|
| (nmol·m <sup>-2</sup> )                                        | (28;43)     | (33;44)     |        |        | (37;57)    | (32;43)    |        |        |
| Beta cell glucose sensitivity                                  | 133         | 136         |        |        | 119        | 97         | 0.4238 | 0.3212 |
| (pmol·min <sup>-1</sup> ·m <sup>-2</sup> ·mmol/l) <sup>a</sup> | (100;187)   | (108;188)   |        |        | (97;153)   | (90;123)   |        |        |
| Clamp insulin sensitivity                                      | 143         | 145         | 0.0003 | <.0001 | 105        | 108        | 0.0002 | <.0001 |
| (μmol·min·kg <sub>FFM</sub> ·nmol·l) <sup>a</sup>              | (111;194)   | (110;197)   |        |        | (81;123)   | (92;150)   |        |        |
| OGIS (ml·min <sup>-1</sup> ·m <sup>2</sup> )*                  | 12.7        | 11.8        | 0.1261 | 0.1973 | 11.0       | 11.0       | <.0001 | <.0001 |
|                                                                | (11.1;14.5) | (10.7;12.9) |        |        | (9.6;13.0) | (9.9;12.4) |        |        |

---

#### Percent change over 3 years

|                                            |            |            |        |        |            |            |        |        |
|--------------------------------------------|------------|------------|--------|--------|------------|------------|--------|--------|
| BMI                                        | 1.0        | 1.3        |        |        | 2.2        | 5.0        | 0.4144 | 0.2552 |
|                                            | (-2.1;4.9) | (-1.8;4.3) |        |        | (-0.5;5.4) | (-0.6;8)   |        |        |
| Basal insulin secretion <sup>a</sup>       | -0.5       | 19.0       | 0.0075 | 0.0139 | -6.5       | 10.3       | 0.0001 | 0.0001 |
|                                            | (-18;20)   | (-1;46)    |        |        | (-25;25)   | (1;17)     |        |        |
| Total insulin secretion <sup>a</sup>       | 4.8        | 12.7       | 0.0089 | 0.0074 | 16.6       | 22.8       | 0.0017 | 0.0088 |
|                                            | (-10;24)   | (-3.8;39)  |        |        | (3.3;40)   | (1.5;49)   |        |        |
| Beta cell glucose sensitivity <sup>a</sup> | -8.7       | -8.7       |        |        | -33        | -22        | 0.1771 | 0.1233 |
|                                            | (-37;35)   | (-30; 30)  |        |        | (-41;-4.1) | (-31;0.4)  |        |        |
| OGIS                                       | -2.7       | -9.7       | 0.0097 | 0.0082 | -17.2      | -20.8      | <.0001 | <.0001 |
|                                            | (-12;7)    | (-21;-2.4) |        |        | (-28;-11)  | (-25; -12) |        |        |

Data are reported as median values (quartile1; quartile 3) or % of baseline characteristics and of per cent change over 3 years. *p* values used multinomial regression, unadjusted and †adjusted for sex, age and BMI. The isolated high FPG and isolated high 2hPG are compared statistically in the case where the comparison over four groups was statistically significant.

<sup>a</sup> Logarithms, base, were used in the logistic regression analyses

FFM, fat-free mass

Progressors on isolated IFG were participants who presented with FPG ≥ 5.6 mmol/l, but 2hPG <7.8 mmol/l;

Progressors on isolated IGT were participants who presented with FPG < 5.6 mmol/l, but 2hPG ≥ 7.8 mmol/l;

Progressors on both FPG and 2hPG high, had FPG ≥ 5.6 mmol/l and 2hPG ≥7.8 mmol/l.

**ESM Table 2** Anthropometrics and metabolic characteristics of RISC participants who had baseline 1hPG  $\geq$ 8.6 mmol/l and progressed over 3 years to isolated IFG, isolated IGT, both.

|                                                                     | Non-progressor<br>n=109 (62%) | Progressor                      | <i>P-values</i>                                                      |                       | Progressor                 | Progressor                         | <i>P-values</i>              |                       |
|---------------------------------------------------------------------|-------------------------------|---------------------------------|----------------------------------------------------------------------|-----------------------|----------------------------|------------------------------------|------------------------------|-----------------------|
|                                                                     |                               | isolated high FPG<br>n=36 (20%) | <i>comparing isolated high FPG and isolated high 2hPG progressor</i> |                       | isolated 2hPH<br>n=14 (8%) | both FPG & 2hPG high<br>n=18 (10%) | <i>comparing four groups</i> |                       |
|                                                                     |                               |                                 | univariate                                                           | adjusted <sup>†</sup> |                            |                                    | univariate                   | adjusted <sup>†</sup> |
| <b>At baseline</b>                                                  |                               |                                 |                                                                      |                       |                            |                                    |                              |                       |
| Men                                                                 | 48%                           | 78%                             | 0.0608                                                               | 0.0798                | 50%                        | 61%                                | 0.0223                       | 0.0204                |
| Age (years)                                                         | 46<br>(38;51)                 | 46<br>(43;54)                   |                                                                      |                       | 42<br>(38;50)              | 48<br>(39;55)                      | 0.4735                       | 0.2613                |
| BMI (kg/m <sup>2</sup> )                                            | 24.7<br>(23.2;27.1)           | 25.8<br>(23.6;28.0)             | 0.6579                                                               | 0.9244                | 25.2<br>(21.8;28.1)        | 28.4<br>(24.5;31.2)                | 0.0332                       | 0.0484                |
| Diabetes in family                                                  | 28%                           | 47%                             |                                                                      |                       | 29%                        | 22%                                | 0.1625                       | 0.1001                |
| Smoker                                                              | 36%                           | 17%                             |                                                                      |                       | 43%                        | 56%                                | 0.0443                       | 0.0830                |
| Fasting plasma glucose (mmol/l)                                     | 5.1<br>(4.8;5.3)              | 5.3<br>(5.1;5.4)                |                                                                      |                       | 5.2<br>(4.9;5.3)           | 5.3<br>(5.1;5.3)                   | 0.0265                       | 0.1171                |
| 2 hour plasma glucose (mmol/l)                                      | 6.1<br>(5.3;6.9)              | 5.9<br>(5.3;6.9)                | 0.0210                                                               | 0.0504                | 6.9<br>(6.1;7.4)           | 6.7<br>(5.8;7.0)                   | 0.0357                       | 0.0465                |
| LDL-cholesterol (mmol/l)                                            | 2.9<br>(2.4;3.3)              | 3.2<br>(2.5;3.7)                |                                                                      |                       | 3.1<br>(2.6;4.0)           | 2.9<br>(2.8;3.5)                   | 0.1950                       | 0.2096                |
| HDL-cholesterol (mmol/l)                                            | 1.4<br>(1.1;1.6)              | 1.3<br>(1.1;1.5)                |                                                                      |                       | 1.3<br>(1.2;1.9)           | 1.2<br>(1.0;1.5)                   | 0.2594                       | 0.5388                |
| Triglycerides (mmol/l) <sup>a</sup>                                 | 0.91<br>(0.70;1.15)           | 1.06<br>(0.69;1.95)             |                                                                      |                       | 0.99<br>(0.87;1.16)        | 1.29<br>(0.89;2.27)                | 0.0144                       | 0.1687                |
| Systolic blood pressure (mmHg)                                      | 119<br>(110;125)              | 125<br>(117;130)                |                                                                      |                       | 118<br>(112;119)           | 122<br>(116;130)                   | 0.0114                       | 0.1120                |
| Diastolic blood pressure (mmHg)                                     | 75<br>(69;80)                 | 78<br>(74;84)                   |                                                                      |                       | 75<br>(72;77)              | 78<br>(71;82)                      | 0.0712                       | 0.3403                |
| Basal insulin secretion (pmol·min <sup>-1</sup> ·m <sup>-2</sup> )* | 65<br>(48;91)                 | 76<br>(66;95)                   | 0.6597                                                               | 0.2730                | 82<br>(72;94)              | 96<br>(82;128)                     | 0.0019                       | 0.0247                |
| Total insulin secretion (nmol·m <sup>-2</sup> )                     | 44<br>(34;55)                 | 45<br>(38;52)                   |                                                                      |                       | 47<br>(43;53)              | 49<br>(42;58)                      | 0.3275                       | 0.6093                |

|                                                                                              |                    |                   |        |        |                   |                 |        |        |
|----------------------------------------------------------------------------------------------|--------------------|-------------------|--------|--------|-------------------|-----------------|--------|--------|
| Beta cell glucose sensitivity (pmol·min <sup>-1</sup> ·m <sup>-2</sup> ·mmol/l) <sup>a</sup> | 90<br>(66;112)     | 83<br>(72;97)     |        |        | 89<br>(82;103)    | 86<br>(56;111)  | 0.8684 | 0.8604 |
| Clamp insulin sensitivity (μmol·min·kg <sub>FFM</sub> ·nmol/l) <sup>a</sup>                  | 133<br>(90;171)    | 100 (82;134)      | 0.4695 | 0.0212 | 79<br>(60;153)    | 89<br>(80;157)  | 0.0151 | 0.0488 |
| OGIS (ml·min <sup>-1</sup> ·m <sup>2</sup> )                                                 | 10.5<br>(9.6;11.9) | 9.9<br>(8.8;11.2) |        |        | 9.4<br>(8.7;12.0) | 10.1 (9.1;11.1) | 0.1785 | 0.6469 |

---

**Percent change over**

**3 years**

|                                            |                   |                    |        |        |                   |                   |        |        |
|--------------------------------------------|-------------------|--------------------|--------|--------|-------------------|-------------------|--------|--------|
| BMI                                        | 1.5<br>(-2.3;3.7) | 1.1<br>(-2.6;2.8)  | 0.1416 | 0.1945 | 1.8<br>(0.4;6.1)  | 4.6<br>(2.2;6.6)  | 0.0596 | 0.0353 |
| Basal insulin secretion <sup>a</sup>       | 4.5<br>(-14;24)   | 12<br>(-5.8;34)    |        |        | -2.3<br>(-17;26)  | 18.0<br>(-4.7;42) | 0.2330 | 0.1780 |
| Total insulin secretion <sup>a</sup>       | -5.3<br>(-22;12)  | -0.2<br>(-18;20)   |        |        | 28<br>(22;32)     | 16<br>(-1.4;34)   | 0.2818 | 0.5469 |
| Beta cell glucose sensitivity <sup>a</sup> | 24<br>(-3.7;74)   | -9.9<br>(-20;50)   |        |        | 9.6<br>(-12;30)   | -1.9<br>(-38;53)  | 0.1328 | 0.2147 |
| OGIS                                       | 7.7<br>(-6.9;20)  | -5.9<br>(-16, 4.1) | 0.0835 | 0.0902 | -14<br>(-17;-9.3) | -19<br>(-23;-13)  | <.0001 | <.0001 |

Data are reported as median values (quartile1; quartile 3) or % of baseline characteristics and of per cent change over 3 years.

*p* values used multinomial regression, unadjusted and †adjusted for sex, age and BMI. The isolated high FPG and isolated high 2hPG are compared statistically in the case where the comparison over four groups was statistically significant.

<sup>a</sup> Logarithms, base, were used in the logistic regression analyses

FFM, fat-free mass

Progressors on isolated IFG were participants who presented with FPG ≥ 5.6 mmol/l, but 2hPG <7.8 mmol/l;

Progressors on isolated IGT were participants who presented with FPG < 5.6 mmol/l, but 2hPG ≥ 7.8 mmol/l;

Progressors on both FPG and 2hPG high, had FPG ≥ 5.6 mmol/l and 2hPG ≥7.8 mmol/l.

## Supplementary Figure

Percentage of people progressing to incident glucose intolerance (fasting plasma glucose  $\geq 5.6$  mmol/l and/or 2 hour plasma glucose  $\geq 7.8$  mmol/l) over a three year follow-up of 797 people from the EGIR-RISC Study. The thresholds of 1hPG potentially associated with risk of progression to glucose intolerance were 6.2; 7.5; 8.6; 8.95 mmol/l)

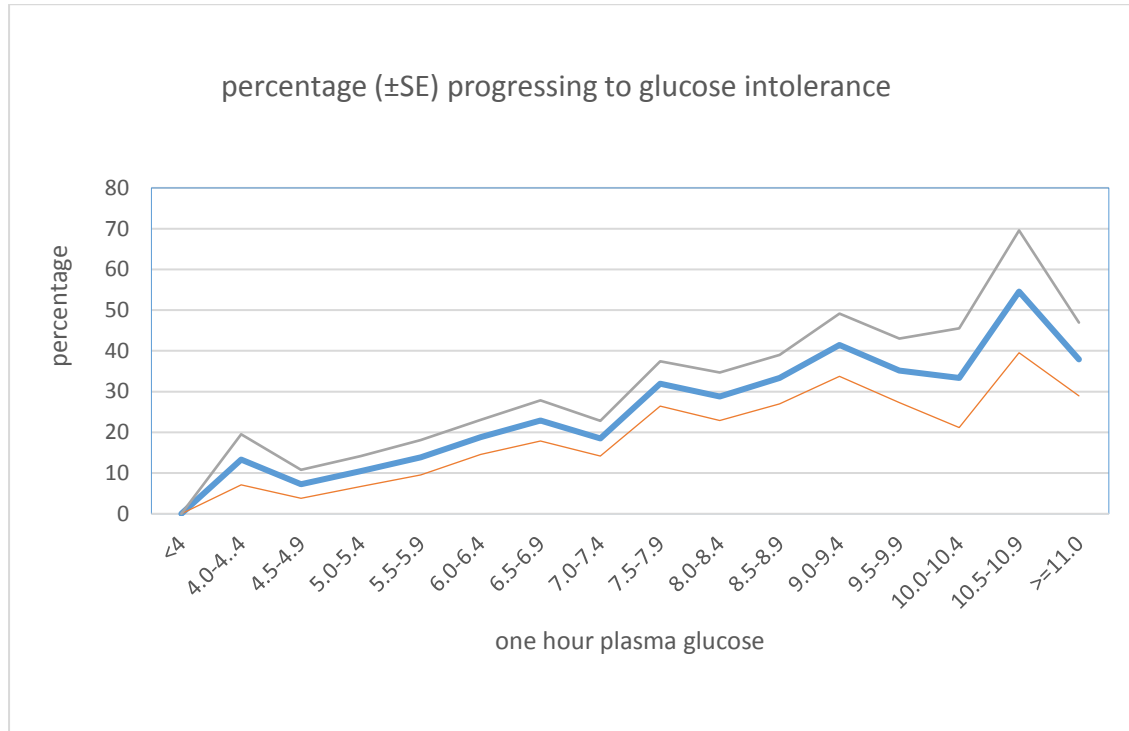

Supplement: MOESM1 [file 16362620]
